# Supplementary material
Source: publisher site journal article supplement (https://www.dovepress.com/article/528382)
Supplement: Supplementary file 1 [file 528382%20Revised%20Supplementary%20Materials.docx]

**Supplementary Figure S1: Flow diagram.**


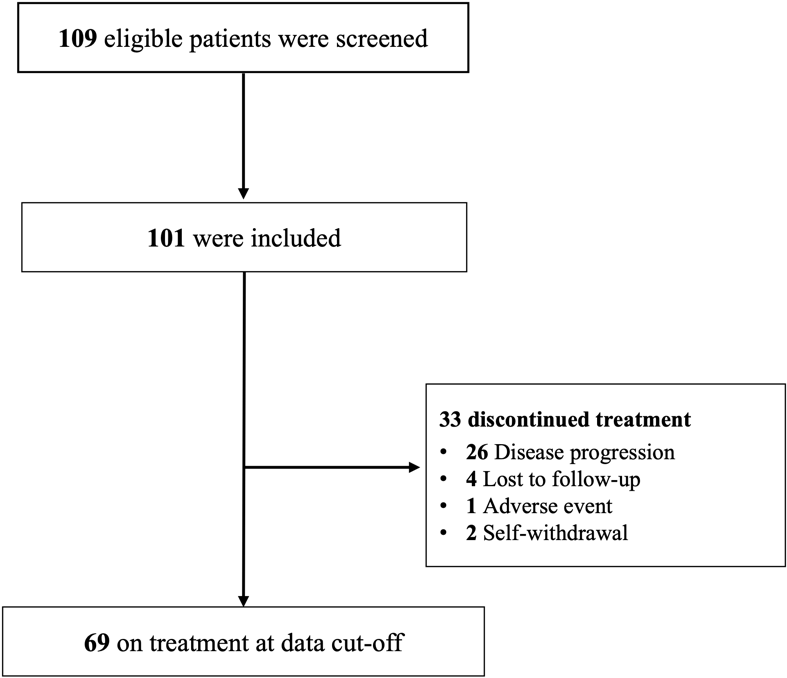


**Supplementary Table S1. AEs leading to treatment interruption, PARPi dose reduction and discontinuation**

| **Terms** | **Treatment interruption (N=40)** | | **Dose reduction (N=38)** | | **Discontinuation (N=7)** | |
| --- | --- | --- | --- | --- | --- | --- |
| **Any grade**  **(No.)** | **Grade ≥3**  **(No.)** | **Any grade**  **(No.)** | **Grade ≥3**  **(No.)** | **Any grade**  **(No.)** | **Grade ≥3**  **(No.)** |
| **Hematological AEs** | | | | | | |
| Anemia | 7 | 7 | 7 | 7 | 0 | 0 |
| Platelet count decreased | 15 | 6 | 14 | 6 | 1 | 1 |
| Neutrophil count decreased | 3 | 3 | 2 | 2 | 0 | 0 |
| Platelet count decreased with Neutrophil count decreased | 2 | 2 | 2 | 2 | 0 | 0 |
| **Non-hematological AEs** | | | | | | |
| Gastrointestinal AEs | 5 | 0 | 5 | 0 | 1 | 0 |
| Insomnia | 1 | 0 | 1 | 0 | 0 | 0 |
| Hypertensiona | 2 | 1 | 2 | 1 | 0 | 0 |
| Palpitation | 2 | 0 | 2 | 0 | 0 | 0 |
| **Others** | 3b | 0 | 3b | 0 | 5c | 0 |

a Treatment interruptions and dose reductions of PARPi were observed in two patients due to hypertension; one patient experienced grade 1 hypertension, while the other had grade 2 hypertension accompanied by severe renal failure.

b Three patients, including one elderly patient with grade 1 hematological adverse event (anemia, platelet count decreased, and neutrophil count decreased), one patient with financial difficulties, and one patient with interstitial pneumonia during treatment.

c Five patients discontinued treatment: three due to low willingness to undergo maintenance treatment, and two due to death from a disease unrelated to the treatment (intracranial infection and cardiac-cerebral vascular disease).

**Supplementary Table S2. Correlations of TEAEs and PFS in patients treated with different doses and initiation time**

|  | **Initial dose** | **Stable dose** | **Patients, No.** | **Any TEAE,**  **n (%)** | **≥3 TEAE,**  **n (%)** | **mPFS (months)** | **P-value** |
| --- | --- | --- | --- | --- | --- | --- | --- |
| **ISD** | 100 mg | 100 mg | 2 | 1 (50%) | 1 (50%) | – | – |
| 200 mga | 100 mg | 20 | 19 (95%) | 10 (50%) | 16.9 | 0.0539 |
| 200 mg | 70 | 51 (72.8%) | 6 (8.6%) | NE |
| 100/200 mg alternative | 1 | 1 (100%) | 0 (0%) | – | – |
| 300 mg | 300 mg | 1 | 0 | 0 | – | – |
| **Non-ISD** | 100 mga | 100 mg | 1 | 1 (100%) | 0 | – | – |
| **Initiation time of maintenance** | | | **Patients,** **No.b** | **Any TEAE,**  **n (%)** | **≥3 TEAE,**  **n (%)** | **mPFS (months)** | ***P*-value** |
| < 12 weeks | | | 85 | 64 | 18 | 23.8 | 0.4059 |
| ≥ 12 weeks | | | 15 | 14 | 3 | NE |

ISD, individualized starting dose; NE, not estimable.

a Six patients in the initial dose of 200 mg group and one patient in the initial dose of 100 mg group discontinued treatment due to adverse events or other reasons.

b Two patients missing the date of last chemotherapy.
